# Supplementary material for: Input Flux and the Risk of Heavy Metal(Loid) of Agricultural Soil in China: Based on Spatiotemporal Heterogeneity from 2000 to 2021
Source: MDPI journal article supplement (doi:10.3390/land12061240), 2023-06-16
Supplement: s1 [file s1]

# Supplementary Material

## Input Flux and the Risk of Heavy Metal(Loid) of Agricultural Soil in China: Based on Spatiotemporal Heterogeneity from 2000 to 2021

Wenyu Ma <sup>1,2</sup>, Yuchun Pan <sup>2</sup>, Zaijin Sun <sup>3,\*</sup>, Changhua Liu <sup>1</sup>, Xiaolan Li <sup>2</sup>, Li Xu <sup>4</sup> and Yunbing Gao <sup>2,\*</sup>

<sup>1</sup> School of Surveying and Land Information Engineering, Henan Polytechnic University, Jiaozuo 454000, China

<sup>2</sup> Research Center of Information Technology, Beijing Academy of Agriculture and Forestry Sciences, Beijing 100097, China

<sup>3</sup> Technical Center for Soil, Agriculture and Rural Ecology and Environment, Ministry of Ecology and Environment, Beijing 100012, China

<sup>4</sup> Institute of Quality Standard and Testing Technology, Beijing Academy of Agriculture and Forestry Sciences, Beijing 100097, China

\* Correspondence: sunzj@craes.org.cn (Z.S.); gaoyb@nercita.org.cn (Y.G.); Tel.: +86-010-5150-3150 (Y.G.)

### List of tables

Table S1. Descriptive statistics of heavy metal input fluxes in China

Table S2. Comparison of researches on atmospheric deposition fluxes of heavy metals in China

Table S3. Agricultural utilization rate of livestock and poultry manures in China

Table S4. Parameters of livestock and poultry excrements

Table S5. Assessment standards of soil environmental capacity

Table S6. Risk screening values for soil contamination of agricultural land

### List of figures

Figure S1. The LISA of heavy metal input flux via atmospheric deposition, fertilizer, irrigation

Figure S2. The LISA of Cd input flux via atmospheric deposition in different periods

Figure S3. Heavy metal content in livestock and poultry excrements (2000-2021)

## 2.1 Data collection and database building

With comprehensive consideration, the following factors need to be taken into account in our study: atmospheric deposition, fertilizer, livestock and poultry manure, irrigation water, while factors that have a low impact such as agrochemical or are not applied universally such as industrial waste and sludge are not considered for the fewer contributions to the quantities of total input.

The relevant publications were collected from Web of Science (WOS) and China National Knowledge Infrastructure (CNKI) with the following search term: *soil AND (agricultural OR farmland OR cropland) AND (heavy metal\* OR trace element\* OR As OR Cd OR Cr OR Cu OR Hg OR Ni OR Pb OR Zn) AND (flux\* OR inventory OR input\* OR source\*) AND (atmospheric deposition OR fertilizer OR irrigation OR manure) AND (China OR Chinese).*

The 109 publications used to create the database are listed in the references[1-109].

Table S1. Descriptive statistics of heavy metal input fluxes in China (mg/m<sup>2</sup>/yr)

| Source                 |      | As    | Cd    | Cr    | Cu    | Hg    | Ni    | Pb     | Zn     | Total |
|------------------------|------|-------|-------|-------|-------|-------|-------|--------|--------|-------|
| Atmospheric deposition | N    | 164   | 235   | 149   | 143   | 125   | 91    | 199    | 141    | 271   |
|                        | n    | 1516  | 1947  | 1024  | 924   | 1455  | 777   | 1621   | 903    |       |
|                        | Min  | 0.04  | 0.03  | 0.14  | 0.56  | 0.003 | 0.19  | 0.42   | 3.4    |       |
|                        | Max  | 8.69  | 1.73  | 34.34 | 34.3  | 0.144 | 15.51 | 59.3   | 231.52 |       |
|                        | Mean | 2.73  | 0.49  | 10.62 | 11.49 | 0.037 | 4.99  | 19.93  | 63.82  |       |
|                        | SD   | 2.09  | 0.38  | 8.08  | 7.68  | 0.031 | 3.49  | 13.53  | 45.79  |       |
| Fertilization          | N    | 91    | 149   | 72    | 78    | 96    | 18    | 110    | 75     | 156   |
|                        | n    | 764   | 1450  | 477   | 458   | 770   | 274   | 869    | 444    |       |
|                        | Min  | 0.051 | 0.001 | 0.14  | 0     | 0     | 0.35  | 0.0054 | 0.27   |       |
|                        | Max  | 2.04  | 0.319 | 3.24  | 5.45  | 0.09  | 3.57  | 10.78  | 22     |       |
|                        | Mean | 0.58  | 0.05  | 0.99  | 1.03  | 0.012 | 0.82  | 0.75   | 5.18   |       |
|                        | SD   | 0.44  | 0.07  | 0.76  | 1.07  | 0.018 | 0.8   | 1.32   | 5      |       |
| Irrigation             | N    | 81    | 146   | 68    | 78    | 78    | 39    | 111    | 80     | 167   |
|                        | n    | 3360  | 1780  | 870   | 893   | 804   | 682   | 1000   | 931    |       |
|                        | Min  | 0     | 0     | 0     | 0     | 0     | 0     | 0      | 0.021  |       |
|                        | Max  | 8.82  | 0.47  | 13    | 7.55  | 0.468 | 5.31  | 7.03   | 55.35  |       |
|                        | Mean | 1.82  | 0.09  | 2.27  | 1.68  | 0.05  | 0.79  | 1.29   | 8.21   |       |
|                        | SD   | 2.1   | 0.12  | 3.29  | 1.69  | 0.086 | 1.44  | 1.75   | 11.4   |       |

Note: N (Sites); n (Samples)

Table S2. Comparison of researches on atmospheric deposition fluxes of heavy metals in China  
(mg/m<sup>2</sup>/yr)

|    | This study<br>(2000-2020) |       |     | Peng [110]<br>(2008-2018) |        |      | Ni and Ma [111]<br>(2006-2015) |       |      | Wang [112]<br>(1995-2015) |       |      |
|----|---------------------------|-------|-----|---------------------------|--------|------|--------------------------------|-------|------|---------------------------|-------|------|
|    | n                         | WM    | RSD | n                         | Mean   | RSD  | n                              | Mean  | RSD  | n                         | Mean  | RSD  |
| As | 1516                      | 2.67  | 77% | 574                       | 3.39   | 68%  | 755                            | 3.37  | 67%  | 254                       | 2.54  | 99%  |
| Cd | 1947                      | 0.49  | 78% | 625                       | 0.59   | 80%  | 762                            | 0.41  | 88%  | 310                       | 0.37  | 256% |
| Cr | 1024                      | 10.77 | 76% | 577                       | 22.32  | 76%  | 763                            | 16.14 | 72%  | 226                       | 10.38 | 264% |
| Cu | 924                       | 11.54 | 67% | 527                       | 16.23  | 141% | 764                            | 11.56 | 74%  | 232                       | 10.99 | 90%  |
| Hg | 1455                      | 0.039 | 84% | 553                       | 0.07   | 71%  | 750                            | 0.09  | 202% | 262                       | 0.07  | 230% |
| Ni | 777                       | 5.06  | 70% | 364                       | 8.61   | 133% | 376                            | 8.08  | 122% | 159                       | 4.79  | 170% |
| Pb | 1621                      | 20.64 | 68% | 608                       | 26.29  | 67%  | 768                            | 19.19 | 72%  | 319                       | 21.81 | 175% |
| Zn | 903                       | 64    | 72% | 617                       | 108.75 | 88%  | 766                            | 72.90 | 124% | 279                       | 78.87 | 206% |

Note: n (Samples); WM (Weighted mean); RSD (Relative standard deviation)

## 2.2 Weighted average calculation

Table S3. Agricultural utilization rate of livestock and poultry manures in China

| Region                                        | Utilization rate | References |
|-----------------------------------------------|------------------|------------|
| Hubei                                         | 30%              | [113]      |
| Lanzhou, Gansu                                | 40%              | [114]      |
| Cenxi, Guangxi                                | 60%              | [115]      |
| Guizhou                                       | 40%              | [116]      |
| Jilin, Hebei, Sichuan, Zhejiang, Anhui        | 80%              | [117]      |
| Zhengzhou, Henan                              | 61%              | [118]      |
| Yinchuan, Ningxia                             | 60%              | [119]      |
| Liaozhong, Liaoning                           | 64%              | [120]      |
| Jinzhou, Liaoning                             | 80%              | [121]      |
| Taixing, Jiangsu                              | 50%              | [122]      |
| Luochuan, Shanxi                              | 60%              | [123]      |
| Inner Mongolia, Liaoning, Jilin, Heilongjiang | 50%              | [124]      |
| Jilin, Hebei, Sichuan, Zhejiang, Anhui        | 63%              | [125]      |
| Average                                       | 57%              |            |
| Utilization rate used in this study           | 21%              |            |

The planting area of grain crops accounts for 70% of the total arable land in China, and the manure is applied more to cash crops, protected vegetable fields, and orchards than to grain crop fields. Therefore, according to the amount of manure applied per unit area and the total amount of excrement produced, the utilization rate of grain crop fields was calculated as 21%.

Table S4. Parameters of livestock and poultry excrements

|         | Excretion parameters [126]<br>(kg/day) | Water contents [127]<br>(%) |
|---------|----------------------------------------|-----------------------------|
| Chicken | 0.37                                   | 53.64                       |
| Pig     | 3.14~3.65                              | 84.2                        |
| Sheep   | 2.25                                   | 61.1                        |
| Cattle  | 18.71~25.015                           | 81.1                        |
| Horse   | 16.16                                  | 75.1                        |
| Donkey  | 13.9                                   | 71.4                        |
| Mule    | 13.9                                   | 72.1                        |
| Rabbit  | 0.37                                   | 76.74                       |

## 2.4 Soil environment risk assessment

Table S5. Assessment standards of soil environmental capacity

| Level | $P_i$                | Risk level    | Description     |
|-------|----------------------|---------------|-----------------|
| I     | $P_i > 1$            | No risk       | High capacity   |
| II    | $0.7 \leq P_i < 1$   | Mild risk     | Medium capacity |
| III   | $0.3 \leq P_i < 0.7$ | Moderate risk | Low capacity    |
| IV    | $0 \leq P_i < 0.3$   | Severe risk   | Alert           |
| V     | $P_i < 0$            | Extreme risk  | Overload        |

Table S6. Risk screening values for soil contamination of agricultural land (mg/kg) [128]

| Element | $pH \leq 5.5$ | $5.5 < pH \leq 6.5$ | $6.5 < pH \leq 7.5$ | $pH > 7.5$ |
|---------|---------------|---------------------|---------------------|------------|
| As      | 30            | 30                  | 25                  | 20         |
| Cd      | 0.3           | 0.3                 | 0.3                 | 0.6        |
| Cr      | 150           | 150                 | 200                 | 250        |
| Cu      | 50            | 50                  | 100                 | 100        |
| Hg      | 0.5           | 0.5                 | 0.6                 | 1          |
| Ni      | 60            | 70                  | 100                 | 190        |
| Pb      | 70            | 90                  | 120                 | 170        |
| Zn      | 200           | 200                 | 250                 | 300        |

## 3.1 Zoning of heavy metal input flux

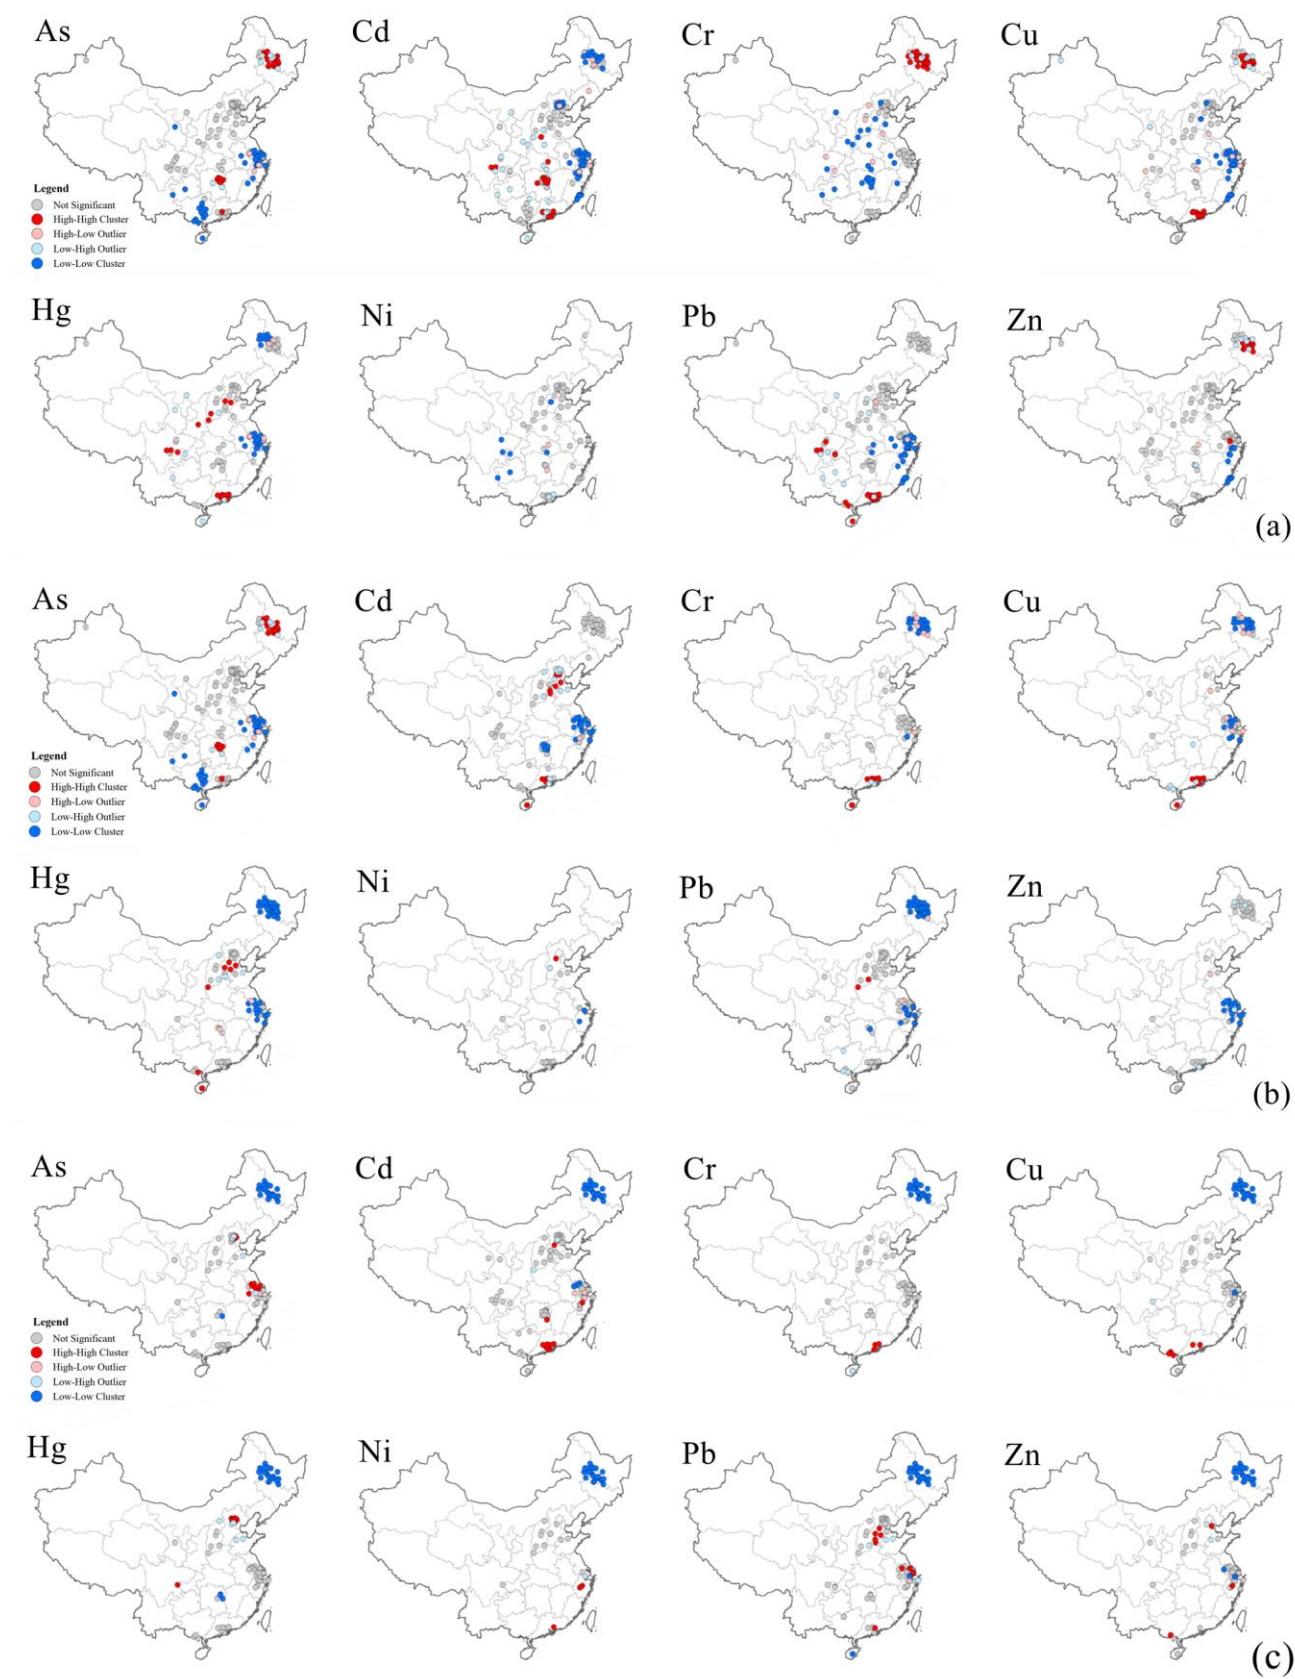

**Figure S1.** The LISA of heavy metal input flux via atmospheric deposition (a), fertilizer (b), irrigation (c)

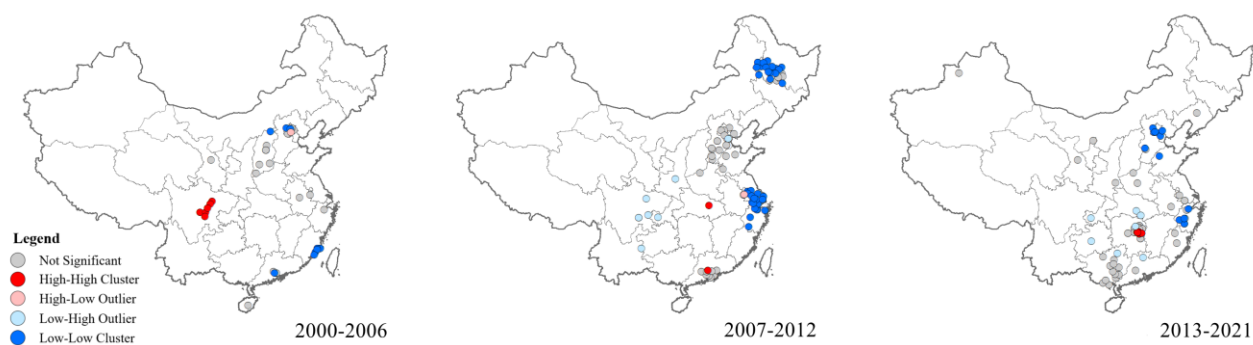

**Figure S2.** The LISA of Cd input flux via atmospheric deposition in different periods

### 3.2.3 Manure

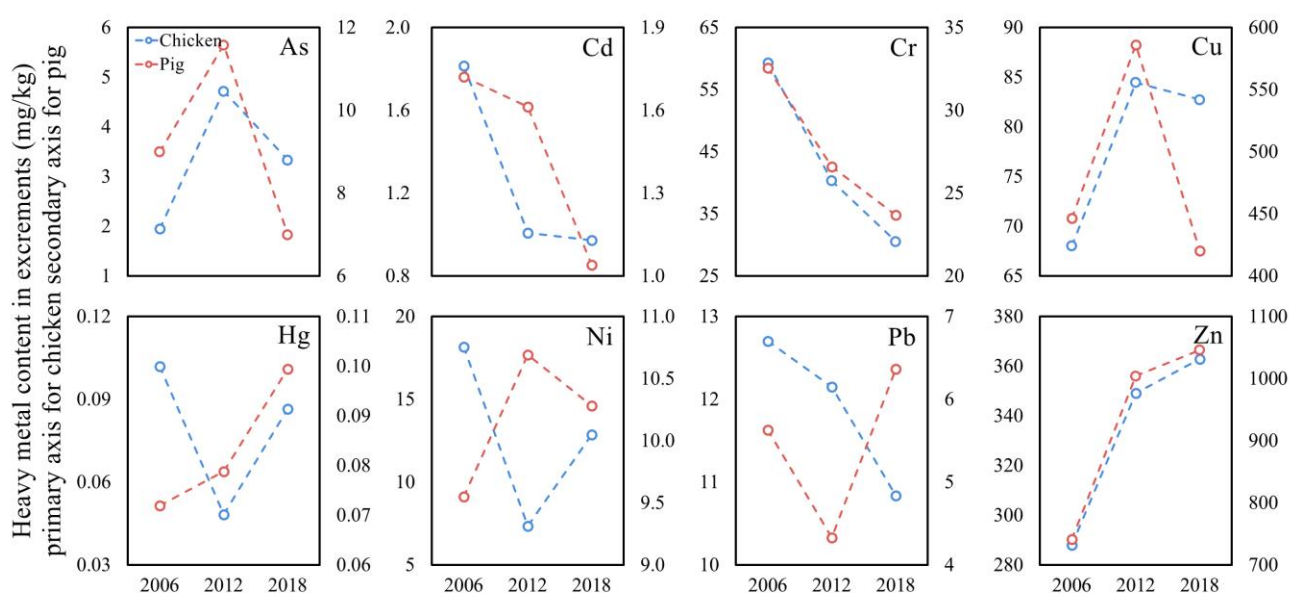

**Figure S3.** Heavy metal content in livestock and poultry excrements (2000-2021)

### References

1. Yang, C.; Sun, G.; Zhang, C.; Chen, Y.; Yang, W.; Shang, L. A New Geochemical Method for Determining the Sources of Atmospheric Particles: A Case Study from Gannan, Northeast China. *Atmosphere-Basel* 2019, 10, doi:10.3390/atmos10100632.
2. Hu, W.; Huang, B.; Shi, X.; Chen, W.; Zhao, Y.; Jiao, W. Accumulation and health risk of heavy metals in a plot-scale vegetable production system in a peri-urban vegetable farm near Nanjing, China. *Ecotox. Environ. Safe.* 2013, 98, 303-309, doi:10.1016/j.ecoenv.2013.09.040.
3. Yi, K.; Fan, W.; Chen, J.; Jiang, S.; Huang, S.; Peng, L.; Zeng, Q.; Luo, S. Annual input and output fluxes of heavy metals to paddy fields in four types of contaminated areas in Hunan Province, China. *Sci. Total Environ.* 2018, 634, 67-76, doi:10.1016/j.scitotenv.2018.03.294.
4. Jiang, W.; Hou, Q.; Yang, Z.; Yu, T.; Zhong, C.; Yang, Y.; Fu, Y. Annual input fluxes of heavy metals in agricultural soil of Hainan Island, China. *Environ. Sci. Pollut. R.* 2014, 21, 7876-7885, doi:10.1007/s11356-014-2679-0.
5. Hou, Q.; Yang, Z.; Ji, J.; Yu, T.; Chen, G.; Li, J.; Xia, X.; Zhang, M.; Yuan, X. Annual net input fluxes of heavy metals of the agro-ecosystem in the Yangtze River delta, China. *J. Geochem. Explor.* 2014, 139, 68-84, doi:10.1016/j.gexplo.2013.08.007.

6. Yang, Y.; Xiao, C.; Wang, F.; Peng, L.; Zeng, Q.; Luo, S. Assessment of the potential for phytoremediation of cadmium polluted soils by various crop rotation patterns based on the annual input and output fluxes. *J. Hazard. Mater.* 2022, 423, 127-183, doi:10.1016/j.jhazmat.2021.127183.
7. Feng, W.; Guo, Z.; Peng, C.; Xiao, X.; Shi, L.; Zeng, P.; Ran, H.; Xue, Q. Atmospheric bulk deposition of heavy metal(loid)s in central south China: Fluxes, influencing factors and implication for paddy soils. *J. Hazard. Mater.* 2019, 371, 634-642, doi:10.1016/j.jhazmat.2019.02.090.
8. Feng, W.; Guo, Z.; Xiao, X.; Peng, C.; Shi, L.; Ran, H.; Xu, W. Atmospheric deposition as a source of cadmium and lead to soil-rice system and associated risk assessment. *Ecotox. Environ. Safe.* 2019, 180, 160-167, doi:10.1016/j.ecoenv.2019.04.090.
9. Xing, W.; Yang, H.; Ippolito, J.A.; Zhao, Q.; Zhang, Y.; Scheckel, K.G.; Li, L. Atmospheric deposition of arsenic, cadmium, copper, lead, and zinc near an operating and an abandoned lead smelter. *J. Environ. Qual.* 2020, 49, 1667-1678, doi:10.1002/jeq2.20151.
10. Cao, X.; Tan, C.; Wu, L.; Luo, Y.; He, Q.; Liang, Y.; Peng, B.; Christie, P. Atmospheric deposition of cadmium in an urbanized region and the effect of simulated wet precipitation on the uptake performance of rice. *Sci. Total Environ.* 2020, 700, 134513, doi:10.1016/j.scitotenv.2019.134513.
11. Wong, C.S.C.; Li, X.D.; Zhang, G.; Qi, S.H.; Peng, X.Z. Atmospheric deposition of heavy metals in the Pearl River Delta, China. *Atmospheric environment* (1994) 2003, 37, 767-776, doi:10.1016/S1352-2310(02)00929-9.
12. Liang, J.; Feng, C.; Zeng, G.; Zhong, M.; Gao, X.; Li, X.; He, X.; Li, X.; Fang, Y.; Mo, D. Atmospheric deposition of mercury and cadmium impacts on topsoil in a typical coal mine city, Lianyuan, China. *Chemosphere* 2017, 189, 198-205, doi:10.1016/j.chemosphere.2017.09.046.
13. Zhang, Y.; Zhang, S.; Zhu, F.; Wang, A.; Dai, H.; Cheng, S.; Wang, J.; Tang, L. Atmospheric heavy metal deposition in agro-ecosystems in China. *Environ. Sci. Pollut. R.* 2018, 25, 5822-5831, doi:10.1007/s11356-017-0892-3.
14. Cao, Z.; Yang, Y.; Lu, J.; Zhang, C. Atmospheric particle characterization, distribution, and deposition in Xi'an, Shaanxi Province, Central China. *Environ. Pollut.* 2011, 159, 577-584, doi:10.1016/j.envpol.2010.10.006.
15. Pan, Y.P.; Wang, Y.S. Atmospheric wet and dry deposition of trace elements at 10 sites in Northern China. *Atmos. Chem. Phys.* 2015, 15, 951-972, doi:10.5194/acp-15-951-2015.
16. Pan, Y.; Liu, J.; Zhang, L.; Cao, J.; Hu, J.; Tian, S.; Li, X.; Xu, W. Bulk Deposition and Source Apportionment of Atmospheric Heavy Metals and Metalloids in Agricultural Areas of Rural Beijing during 2016–2020. *Atmosphere-Basel* 2021, 12, 283, doi:10.3390/atmos12020283.
17. Ma, Y.; Tang, Y.; Xu, H.; Zhang, X.; Liu, H.; Wang, S.; Zhang, W. Bulk/wet deposition of trace metals to rural, industrial, and urban areas in the Yangtze River Delta, China. *Ecotox. Environ. Safe.* 2019, 169, 185-191, doi:10.1016/j.ecoenv.2018.11.002.
18. Fu, Y.; Li, F.; Guo, S.; Zhao, M. Cadmium concentration and its typical input and output fluxes in agricultural soil downstream of a heavy metal sewage irrigation area. *J. Hazard. Mater.* 2021, 412, 125203, doi:10.1016/j.jhazmat.2021.125203.
19. Tang, Y.; Han, G. Characteristics of major elements and heavy metals in atmospheric dust in Beijing, China. *J. Geochem. Explor.* 2017, 176, 114-119, doi:10.1016/j.gexplo.2015.12.002.
20. Chen, L.; Zhou, S.; Wu, S.; Wang, C.; Li, B.; Li, Y.; Wang, J. Combining emission inventory and isotope ratio analyses for quantitative source apportionment of heavy metals in agricultural soil. *Chemosphere* 2018, 204, 140-147, doi:10.1016/j.chemosphere.2018.04.002.
21. Chen, L.; Zhou, S.; Wu, S.; Wang, C.; He, D. Concentration, fluxes, risks, and sources of heavy metals in atmospheric deposition in the Lihe River watershed, Taihu region, eastern China. *Environ. Pollut.* 2019, 255, 113301, doi:10.1016/j.envpol.2019.113301.
22. Cai, K.; Li, C. Ecological risk, input flux, and source of heavy metals in the agricultural plain of Hebei Province, China. *Int. J. Env. Res. Pub. He.* 2022, 19, 2288, doi:10.3390/ijerph19042288.
23. Abuduwailil, J.; Zhaoyong, Z.; Fengqing, J. Evaluation of the pollution and human health risks posed by heavy metals in the atmospheric dust in Ebinur Basin in Northwest China. *Environ. Sci. Pollut. R.* 2015, 22, 14018-14031, doi:10.1007/s11356-015-4625-1.
24. Yang, Y.; Li, Y.; Dai, Y.; Wang, M.; Chen, W.; Wang, T. Historical and future trends of cadmium in rice soils deduced from long-term regional investigation and probabilistic modeling. *J. Hazard. Mater.* 2021, 415, 125746, doi:10.1016/j.jhazmat.2021.125746.
25. Xie, Y.; Zhu, J.; Liu, S.; Pan, S.; Ji, X. Input and output of cadmium (Cd) for paddy soil in central south China: fluxes, mass balance, and model predictions. *Environ. Sci. Pollut. R.* 2020, 27, 21847-21858, doi:10.1007/s11356-020-08519-4.
26. Yan, X.; Zhao, W.; Yang, X.; Liu, C.; Zhou, Y. Input–output balance of cadmium in typical agriculture soils with historical sewage irrigation in China. *J. Environ. Manage.* 2020, 276, 111298, doi:10.1016/j.jenvman.2020.111298.
27. Shi, T.; Ma, J.; Wu, F.; Ju, T.; Gong, Y.; Zhang, Y.; Wu, X.; Hou, H.; Zhao, L.; Shi, H. Mass balance-based inventory of heavy metals inputs to and outputs from agricultural soils in Zhejiang Province, China. *Sci. Total Environ.* 2019, 649, 1269-1280, doi:10.1016/j.scitotenv.2018.08.414.



28. Huang, S.; Tu, J.; Liu, H.; Hua, M.; Liao, Q.; Feng, J.; Weng, Z.; Huang, G. Multivariate analysis of trace element concentrations in atmospheric deposition in the Yangtze River Delta, East China. *Atmos. Environ.* 2009, 43, 5781-5790, doi:10.1016/j.atmosenv.2009.07.055.
29. Cai, K.; Li, C.; Song, Z.; Gao, X.; Wu, M. Pollution and health risk assessment of carcinogenic elements As, Cd, and Cr in multiple media—A case of a sustainable farming area in China. *Sustainability-Basel* 2019, 11, 5208, doi:10.3390/su11195208.
30. Xia, X.; Yang, Z.; Cui, Y.; Li, Y.; Hou, Q.; Yu, T. Soil heavy metal concentrations and their typical input and output fluxes on the southern Song-nen Plain, Heilongjiang Province, China. *J. Geochem. Explor.* 2014, 139, 85-96, doi:10.1016/j.gexplo.2013.06.008.
31. Liu, J.; Wang, D.; Song, B.; Chen, Z.; Zhang, X.; Tang, Y. Source apportionment of Pb in a rice-soil system using field monitoring and isotope composition analysis. *J. Geochem. Explor.* 2019, 204, 83-89, doi:10.1016/j.gexplo.2019.05.009.
32. Hu, W.; Wang, H.; Dong, L.; Huang, B.; Borggaard, O.K.; Bruun Hansen, H.C.; He, Y.; Holm, P.E. Source identification of heavy metals in peri-urban agricultural soils of southeast China: An integrated approach. *Environ. Pollut.* 2018, 237, 650-661, doi:10.1016/j.envpol.2018.02.070.
33. Qiu, K.; Xing, W.; Scheckel, K.G.; Cheng, Y.; Zhao, Z.; Ruan, X.; Li, L. Temporal and seasonal variations of As, Cd and Pb atmospheric deposition flux in the vicinity of lead smelters in Jiyuan, China. *Atmos. Pollut. Res.* 2016, 7, 170-179, doi:10.1016/j.apr.2015.09.003.
34. Li, Y.; Zhou, S.; Jia, Z.; Liu, K.; Wang, G. Temporal and spatial distributions and sources of heavy metals in atmospheric deposition in western Taihu Lake, China. *Environ. Pollut.* 2021, 284, 117465, doi:10.1016/j.envpol.2021.117465.
35. Liao, S.; Jin, G.; Khan, M.A.; Zhu, Y.; Duan, L.; Luo, W.; Jia, J.; Zhong, B.; Ma, J.; Ye, Z. et al. The quantitative source apportionment of heavy metals in peri-urban agricultural soils with UNMIX and input fluxes analysis. *Environmental Technology & Innovation* 2021, 21, 101232, doi:10.1016/j.eti.2020.101232.
36. Wang, F.; Peng, L.; Zhou, X.; Zeng, Q.; Luo, S. Typical sources of Cd to paddy fields in different contaminated areas and their impacts on Cd accumulation in topsoil and rice in Changzhutan, China. *Environ. Res.* 2021, 193, 110523, doi:10.1016/j.envres.2020.110523.
37. Ye, L.; Huang, M.; Zhong, B.; Wang, X.; Tu, Q.; Sun, H.; Wang, C.; Wu, L.; Chang, M. Wet and dry deposition fluxes of heavy metals in Pearl River Delta Region (China): Characteristics, ecological risk assessment, and source apportionment. *J. Environ. Sci.-China* 2018, 70, 106-123, doi:10.1016/j.jes.2017.11.019.
38. Zhong, C. A regional eco-geochemical assessment in agroecosystem of main basins in Shanxi Province (in Chinese), China University of Geosciences, Beijing, Beijing.
39. Tang, Q.; Yang, Z.; Zhang, B.; Feng, H.; Wang, H. A study of elements flux and sources from atmospheric bulk deposition in the Chengdu economic region (in Chinese). *Earth Science Frontiers* 2007, 213-222.
40. Zhou, Y.; Shen, W.; Li, Y.; Dou, L.; Li, W.; Lai, Q.; Du, H.; Zhong, L.; Liang, T. A study of prediction and early-warning forecast on geochemical accumulation of soil heavy metals based on flux model in Pearl River Delta economic zone (in Chinese). *Advances in Earth Science* 2012, 27, 1115-1125.
41. Dong, T.; Yang, H.; Li, H.; Qiao, Y.; Su, D. Accumulation characteristics of heavy metals in the soil with wheat-corn rotation system in north China (in Chinese). *Journal of Agricultural Resources and Environment* 2014, 31, 355-365.
42. Wang, Z. An analysis of the input flux and source of elements in dry and wet atmospheric deposition of southwest plain of Shandong: A case study of Juye County (in Chinese). *Geophysical and Geochemical Exploration* 2020, 44, 839-846.
43. Zheng, X.; Zheng, G.; Luo, J.; Zhang, Y.; Yan, X.; Wei, H.; Wang, C.; Wang, J.; Liu, X. An early warning study on the ecological geochemistry prediction of atmospheric deposition of northern Qianqiang City, Hubei Province (in Chinese). *Resources Environment & Engineering* 2018, 32, 21-29.
44. Yang, Z.; Hou, Q.; Yu, T.; Chen, J.; Xia, X.; Huang, Y.; Li, K. An example of eco-geochemical assessment for agroecosystems: A study of cd in Chengdu economic region (in Chinese). *Earth Science Frontiers* 2008, 23-35.
45. Tang, S.; Jiang, K.; Huang, J.; Qin, J.; Long, J.; Hou, H.; Peng, P. Analysis of cadmium balance source in soil-rice system in a certain area of Xiangxiang City (in Chinese). *J. Soil Water Conserv.* 2020, 34, 365-371.
46. Jiang, K. Analysis of cadmium interception effect and soil cadmium balance in irrigation wetland of paddy field system in central Hunan (in Chinese), Central South University of Forestry and Technology, Changsha.
47. Shi, T.; Yang, B.; Ma, G.; Yang, J.; Cao, Y. Analysis of environmental geochemical characteristics of atmospheric dry deposition in Shizuishan area (in Chinese). *Ningxia Engineering Technology* 2020, 19, 270-273.
48. Wang, R.; Zou, X.; Zhao, J.; Zhang, Y. Analysis on farmland soil erosion and deposition features in Beijing Plain (in Chinese). *J. Soil Water Conserv.* 2011, 25, 20-24, 29.
49. Li, D.; Shi, D.; Shen, R.; Hu, S.; Yang, J.; Li, Z.; Pan, L. Analysis on source apportionment of atmosphere particulates in Jiangnan Plain, China (in Chinese). *Geoscience* 2008, 22, 915-921.
50. Liang, Y. Analysis on the source of heavy metal and the safety of rice in the typical farmland in the suburb of Changsha (in Chinese), Hunan Normal University, Changsha.



51. Chen, X.; Yang, Z.; Chen, Y.; Yang, Q.; Wang, L.; Wei, X. Arsenic input flux in farmland soil of 9 counties in the middle east of Guangxi (in Chinese). *Geoscience* 2019, 33, 525-534.
52. Dong, W.; Guo, B.; Lin, Y.; Liu, S.; Song, J. Assessment of input-output patterns of cd and pb of typical heavy metal polluted agricultural land in Quzhou (in Chinese). *Journal of Nuclear Agricultural Sciences* 2020, 34, 1061-1069.
53. Bao, L.; Yang, L.; Dong, J.; Zhou, J. Atmospheric deposition characteristic and its influence on the earth surface in western Chongqing agricultural area (in Chinese). *Environmental Pollution & Control* 2016, 38, 41-46.
54. Wu, C.; Qi, S.; Su, Q.; Fang, M.; Wang, W. Atmospheric deposition of heavy metals to Xinghua Bay, Fujian Province (in Chinese). *Environ. Chem.* 2006, 781-784.
55. Zhang, G. Atmospheric wet and dry deposition and its impacts on agricultural soils in northern China (in Chinese), Gansu Agricultural University, Lanzhou.
56. Shi, G. Biogeochemical cycles of toxic metals in farmland soil-plant system (in Chinese), East China Normal University, Shanghai.
57. Xu, Y.; Huang, B.; Shi, X.; Yu, D.; Wang, H.; Chang, Q.; Zhou, L. Budget of heavy metals in small-sized vegetable farming system in a typical peri-urban agricultural area (in Chinese). *Soils* 2008, 249-256.
58. Xiao, M.; Yang, W.; Zhang, Z.; Lv, X.; Chi, D. Cadmium accumulation in soil and risk prediction in the Qaidam Basin (in Chinese). *Journal of Plant Nutrition and Fertilizer* 2014, 20, 1271-1279.
59. Tang, Q.; Yang, Z.; Zhang, B.; Jin, L.; Liu, A. Cadmium flux in soils of the agroecosystem in the Chengdu economic region, Sichuan, China (in Chinese). *Geological Bulletin of China* 2007, 869-877.
60. Chen, X.; Yang, Z.; Chen, Y.; Yang, Q.; Wang, L.; Wei, X. Cadmium input flux in farmland soil of 9 counties in the middle east of Guangxi (in Chinese). *Geophysical and Geochemical Exploration* 2019, 43, 415-427.
61. Zhang, Z. Characteristics of heavy metals and environmental effects in farmland - Maize in Baiyin area, Gansu Province (in Chinese), Chang'an University, Xi'an.
62. Lu, H.; Li, J.; Chen, H.; Li, J.; Ni, W. Crop yields and heavy metal balance in soil-tomato system as affected by application of livestock and poultry manure (in Chinese). *J. Soil Water Conserv.* 2014, 28, 237-242.
63. Wang, C.; Xia, X.; Zhao, X.; Zheng, W.; Zhou, G.; Hu, X.; Ji, S. Distribution and migration regularity of soil heavy metal pollution along the Xiaoqing watershed, Shandong Province (in Chinese). *Geology in China* 2012, 39, 530-538.
64. Wang, H.; Li, J.; Sun, Z.; Zhao, X. Distribution characteristics and sources analysis of heavy metals in atmospheric dustfall in Panxian County of Guizhou Province (in Chinese). *Journal of Guizhou University (Natural Sciences)* 2014, 31, 124-127.
65. Dai, Y. Distribution characteristics and primary investigation on source apportionment of soil-vegetable heavy metals in Chongqing (in Chinese), Southwest University, Chongqing.
66. Lei, S.; Wu, G.; Wang, X. Distribution of heavy metals in soil and spring wheat in Baiyin district (in Chinese). *Gansu Metallurgy* 2007, 86-88.
67. Cong, Y.; Chen, Y.; Yang, Z.; Hou, Q.; Wang, H. Dry and wet atmospheric deposition fluxes of elements in the plain area of Beijing Municipality, China (in Chinese). *Geological Bulletin of China* 2008, 257-264.
68. Cong, Y.; Zheng, P.; Chen, Y.; Hou, Q. Ecological risk assessments of heavy metals in soils of the farmland ecosystem of Beijing, China (in Chinese). *Geological Bulletin of China* 2008, 681-688.
69. Zhang, N. Effects of air settlement on heavy metal accumulation in soil (in Chinese). *Soil and Environmental Sciences* 2001, 10, 91-93.
70. Lai, M.; Yang, Z.; Wang, H.; Zhou, J.; Wang, J. Effects of atmospheric fallouts on heavy metal elements accumulation in soils in farmland areas in the Taiyuan Basin, Shanxi, China and sources of fallouts (in Chinese). *Geological Bulletin of China* 2008, 27, 240-245.
71. Lu, H. Effects of fertilizer management on macronutrient and heavy metal balance in soil-crop systems (in Chinese), Zhejiang University, Hangzhou.
72. Kong, W.; Ni, W. Effects of integrated fertilization with commercial organic manure and chemical fertilizers on heavy metal balance in soil-rice cropping system (in Chinese). *Chinese Journal of Rice Science* 2006, 517-523.
73. Sun, C.; Chen, Z.; Bi, C.; Liu, Y.; Zhang, C.; Wang, D.; Shi, G.; Ye, M. Evaluation on environmental quality of heavy metals in agricultural soils of Chongming Island, Shanghai (in Chinese). *Acta Geographica Sinica* 2009, 64, 619-628.
74. Zhang, N.; Chen, J.; Chang, X. Factors affecting heavy metal accumulation in soil of sewage irrigation area (in Chinese). *Soils* 2002, 90-93.
75. Zhang, M.; Yang, D. Flows and mass balance of heavy metals in two typical farming systems in Shaoxing Plain, Zhejiang Province, China (in Chinese). *Ecology and Environmental Sciences* 2010, 19, 320-324.
76. Ma, W.; Zhang, M. Flows and mass balance of heavy metals in typical tea ecological systems in Zhejiang Province, China (in Chinese). *Journal of Tea Science* 2011, 31, 362-370.
77. Lu, H.; Ye, W.; Zhang, G.; Li, J.; Ni, W. Heavy metal balance in soil-pakchoi system as affected by application of commercial organic manure (in Chinese). *Chinese Journal of Soil Science* 2014, 45, 1511-1516.

78. Hou, J.; Shen, Y.; Cao, S.; Cheng, X.; Wang, W. Heavy metal flux research in Tianjin suburb vegetable farmland (in Chinese). *Journal of Anhui Agricultural Sciences* 2013, 41, 5764-5773.
79. Zheng, X.; Wang, J.; Wei, L.; Zheng, G.; Hu, R.; Tang, S.; Liu, X.; Liu, D.; Xu, Z. Heavy metals and pH in dry and wet deposition in a certain area of Honghu City (in Chinese). *Urban Environment & Urban Ecology* 2016, 29, 18-20, 27.
80. Jian, Y. Heavy metals fluxes and their source and sink patterns in a small watershed of Minjiang River (in Chinese), Sichuan Agricultural University, Ya'an.
81. Xu, H.; Wu, D.; Li, G.; Wu, L.; Ye, C.; Guo, B.; Ma, J.; Ye, Z.; Liu, D. Input and output balance of cadmium(cd) in cultivated land with moderate pollution in Songyang County (in Chinese). *Journal of Zhejiang A&F University* 2021, 38, 1231-1237.
82. Zhu, P.; Liu, Y.; Chen, L.; Gao, S.; Zhang, J.; Yang, W.; Li, Y.; Liu, K. Input pattern of sources for pb, cd and zn in the agricultural ecological system in the lower reaches of Minjiang River (in Chinese). *Journal of Agro-Environment Science* 2013, 32, 1814-1820.
83. Xie, G.; Ying, J.; Zhang, M. Mass balance of heavy metals in typical pear orchard ecological system affected by fertilization and atmospheric deposition (in Chinese). *Chinese Agricultural Science Bulletin* 2019, 35, 88-94.
84. Shi, Y. Modeling and mapping of critical loads for heavy metals in suburb agro-ecosystem of Taihu basin (in Chinese), Nanjing University, Nanjing.
85. Yan, X. Pollution characterization of heavy metals in air, soil and precipitation in Xi'an (in Chinese), Xi'an University of Architecture and Technology, Xi'an.
86. Jiang, W. Potential hazardous element geochemistry in agro-ecosystem of areas around Beibu Gulf (in Chinese), China University of Geosciences, Beijing, Beijing.
87. Wu, C.; Qi, S.; Fang, M.; Su, Q. Precipitation characteristics of heavy metal in dustfall to Quanzhou Bay of Fujian Province (in Chinese). *Research of Environmental Sciences* 2006, 27-30.
88. Shi, T. Prediction and early-warning forecast on heavy metals and their pollution status in agricultural soils in Zhejiang Province, China based on input-output inventory (in Chinese), Northwest A&F University, Xianyang.
89. Xu, H.; Li, D.; Yang, J.; Zhang, X.; Zhu, L. Preliminary study on flux of atmospheric dry and wet deposition of heavy metal elements in Yunmeng County, Hubei Province (in Chinese). *Resources Environment & Engineering* 2015, 29, 816-821.
90. Song, Z.; Chen, Y.; Cui, X.; Luan, W.; Li, S. Research on as flux in soils of the Hebei Plain, China (in Chinese). *Earth and Environment* 2011, 39, 167-173.
91. Liu, H. Research on geochemical background and flux for cadmium, mercury and lead in soil environment in the piedmont region of Taihang Mountain (in Chinese), Hebei GEO University, Shijiazhuang.
92. Li, B. Research on the current status of wetland and grassland eco-environment in the western part of Jilin Province (in Chinese), Jilin University, Changchun.
93. Jin, G. Research on source apportionment of heavy metals in farmland soil at small scale (in Chinese), Zhejiang A&F University, Hangzhou.
94. Zhao, X. Risk assessment in the hilly region of Sichuan central section (in Chinese), Chengdu University of Technology, Chengdu.
95. Wang, L.; Song, Z.; Gong, D.; Jia, W.; Sun, S.; Geng, N.; Ru, S.; Sun, M.; Zhang, G. Security early warning of cadmium in non-environmental pollution vegetable soil in Hebei Plain (in Chinese). *Chinese Agricultural Science Bulletin* 2016, 32, 126-132.
96. Wang, W.; Cao, S.; Li, G.; Zhang, Y. Sedimentation flux and its evaluation of dry and wet atmospheric deposition of heavy metal elements in north Tianjin (in Chinese). *Environmental Science and Management* 2017, 42, 46-51.
97. Dai, Y.; Fu, K.; Yang, Y.; Wang, M.; Chen, W. Simulation cadmium(cd) accumulation in typical paddy soils in South China (in Chinese). *Environmental Science* 2021, 42, 353-358.
98. Zhang, X. Soil environmental quality monitoring in the Yangtze River Delta (in Chinese), China University of Geosciences, Beijing, Beijing.
99. Li, Y. Source/sink pattern on lead (pb), zinc (zn) and cadmium (cd) in different planting modes in the lower reaches of Minjiang (in Chinese), Sichuan Agricultural University, Ya'an.
100. Xiong, Z. Studies on pollution characteristics and risk assessment of heavy metal in Hebei's farmland soil - A case of cadmium and nickel (in Chinese), Chinese Academy of Agricultural Sciences.
101. Nan, M. Study on atmospheric dry and wet deposition fluxes and geochemical classification in Lianyuan area (in Chinese). *City Geography* 2016, 97-99.
102. Chen, Y.; Hu, H. Study on heavy metal pollution sources in the watershed of Jianghuai River in Hefei (in Chinese), Geoscience Science and Technology Forum of six Provinces and one City in East China in 2007, Hefei, China: Hefei, China, 2007.
103. Han, H. Study on land quality geochemical assessment of prime farmland protection area in Qingyang (in Chinese), China University of Geosciences, Beijing, Beijing.

104. Xiong, A.; Chen, Y.; Dai, Y.; Hou, J.; Yi, T. Study on lead flux in vegetable-based soil in Chongqing suburb based on heavy metals flow (in Chinese). *Environmental Impact Assessment* 2016, 38, 92-96.
105. Zhang, G. Study on the influences of atmospheric deposition on the heavy metal pollution in the farmland over the Bohai Sea region and corresponding preventions (in Chinese), Gansu Agricultural University, Lanzhou.
106. Li, S.; Luan, W.; Song, Z.; Cui, X.; Wu, X. The distribution and source of atmospheric dustfall in the southern plain of Hebei Province (in Chinese). *Geology in China* 2010, 37, 1769-1774.
107. Huang, Y. The exploring of heavy metal pollution source apportionment in various scale of agricultural soils (in Chinese), Zhejiang University, Hangzhou.
108. Wang, X.; Liang, B. The geochemistry characteristics of the atmospheric dust from the Chinese herbal origin area (in Chinese). *Science and Technology of West China* 2012, 11, 35-36, 30.
109. Cai, J. The research on the analysis and fluctuation rule of cadmium pollution sources in the typical paddy fields - A case study of Changsha County (in Chinese), Hunan University, Changsha.
110. Peng, H.; Chen, Y.; Weng, L.; Ma, J.; Ma, Y.; Li, Y.; Islam, M.S. Comparisons of heavy metal input inventory in agricultural soils in North and South China: A review. *Sci. Total Environ.* 2019, 660, 776-786, doi:10.1016/j.scitotenv.2019.01.066.
111. Ni, R.; Ma, Y. Current inventory and changes of the input/output balance of trace elements in farmland across China. *PLoS One* 2018, 13, e199460, doi:10.1371/journal.pone.0199460.
112. Wang, M.; Yuan, M.; Su, D. Characteristics and spatial-temporal variation of heavy metals in atmospheric dry and wet deposition of China. *China Environmental Science* 2017, 37, 4085-4096.
113. Luo, J. Strengthen the construction of rural environmental policies and laws in Hubei and promote the construction of new socialist countryside.
114. Li, X. Old and new pollution is intertwined with rural environment worries. *Lanzhou Daily* 2010.
115. Liang, T. Cenxi, Guangxi - Five Actions out of the acceleration of green development. *Farmers' Daily* 2022.
116. Wang, W.; Chen, L.; Fan, C.; Qin, S. The status and utilization counter measures of Guizhou manure resources. *Southwest China Journal of Agricultural Sciences* 2010.
117. Qiu, H.; Luan, J.; Kong, X.; Jing, Y. Estimation of nitrogen utilization efficiency in China's agricultural production. *Journal of Qingdao Agricultural University (Natural Science)* 2014.
118. Gao, T.; Chang, M.; Fu, T.; Shi, P.; Zhao, F. Calculation of comprehensive utilization rate of feces in large-scale dairy farms, The 7th National Congress and Symposium of Animal Ecology Branch of Chinese Society of Animal Science and Veterinary Medicine, 2008.
119. Liang, X. The new scene in the field, the 'iron bulls' showing their talents. *Yinchuan Daily* 2022.
120. Lu, J.; Wang, Z.; Chi, F.; Bing, L.; Wang, M. Present Situation, Potential and countermeasures of Livestock Manure Recycling in the Circular Agriculture: A Case in Liaozhong County. *Ecological Economy* 2015, 31, 107-113.
121. Yao, P.; Yu, Z.; Yao, Z. Investigation and control measures on pollution of livestock and poultry breeding in Jinzhou City, Proceedings of National High-level Forum on Comprehensive Prevention and Control of Agricultural Non-point Source Pollution, 2008.
122. Ye, G.; Fan, B.; Zhou, L.; Zhang, C.; Wang, Z. Status and countermeasure of comprehensive utilization of agricultural waste in Taixing City. *Modern Agricultural Science and Technology* 2014.
123. Xing, L.; Yang, S.; Liu, H. Evaluation of agricultural sustainable development in main apple production areas in Weibei, Shaanxi Province: Taking Luochuan, Xunyi and Baishui county as examples. *Journal of China Agricultural University* 2019, 24, 213-222.
124. Yang, Z.; Lu, W.; Long, Y. Atmospheric dry and wet deposition of heavy metals in Changchun City, China. *Research of Environmental Sciences* 2009, 22, 28-34.
125. Mo, H.; Qiu, H.; Wang, J.; Bai, J. The methods of disposal of livestock and poultry waste and its influencing factors. *Journal of Agricultural Resources and Environment* 2011, 28, 59-64.
126. Bao, W.; Liu, J.; An, J.; Xie, G. Value-taking of livestock and poultry excreta factor in China. *Journal of China Agricultural University* 2018, 23, 1-14.
127. Bao, W.; Liu, J.; An, J.; Xie, G. Discussion on value-taking of relative parameters for assessment of livestock and poultry excrement resource in China. *Transactions of the Chinese Society of Agricultural Engineering* 2018, 34, 314-322.
128. MEE Soil environmental quality risk control standard for soil contamination of agricultural land (GB15618-2018). Ministry of Ecology and Environment of the PRC 2018.
